# Supplementary material for: Development and validation of an early pregnancy risk score for the prediction of gestational diabetes mellitus in Chinese pregnant women
Source: PubMed Central journal article supplement — BMJ Open Diabetes Res Care. 2020 Apr 22;8(1):e000909. doi: 10.1136/bmjdrc-2019-000909 (PMC7202751; doi:10.1136/bmjdrc-2019-000909), 2020-04-22
Supplement: bmjdrc-2019-000909supp001.pdf [file bmjdrc-2019-000909supp001.pdf]

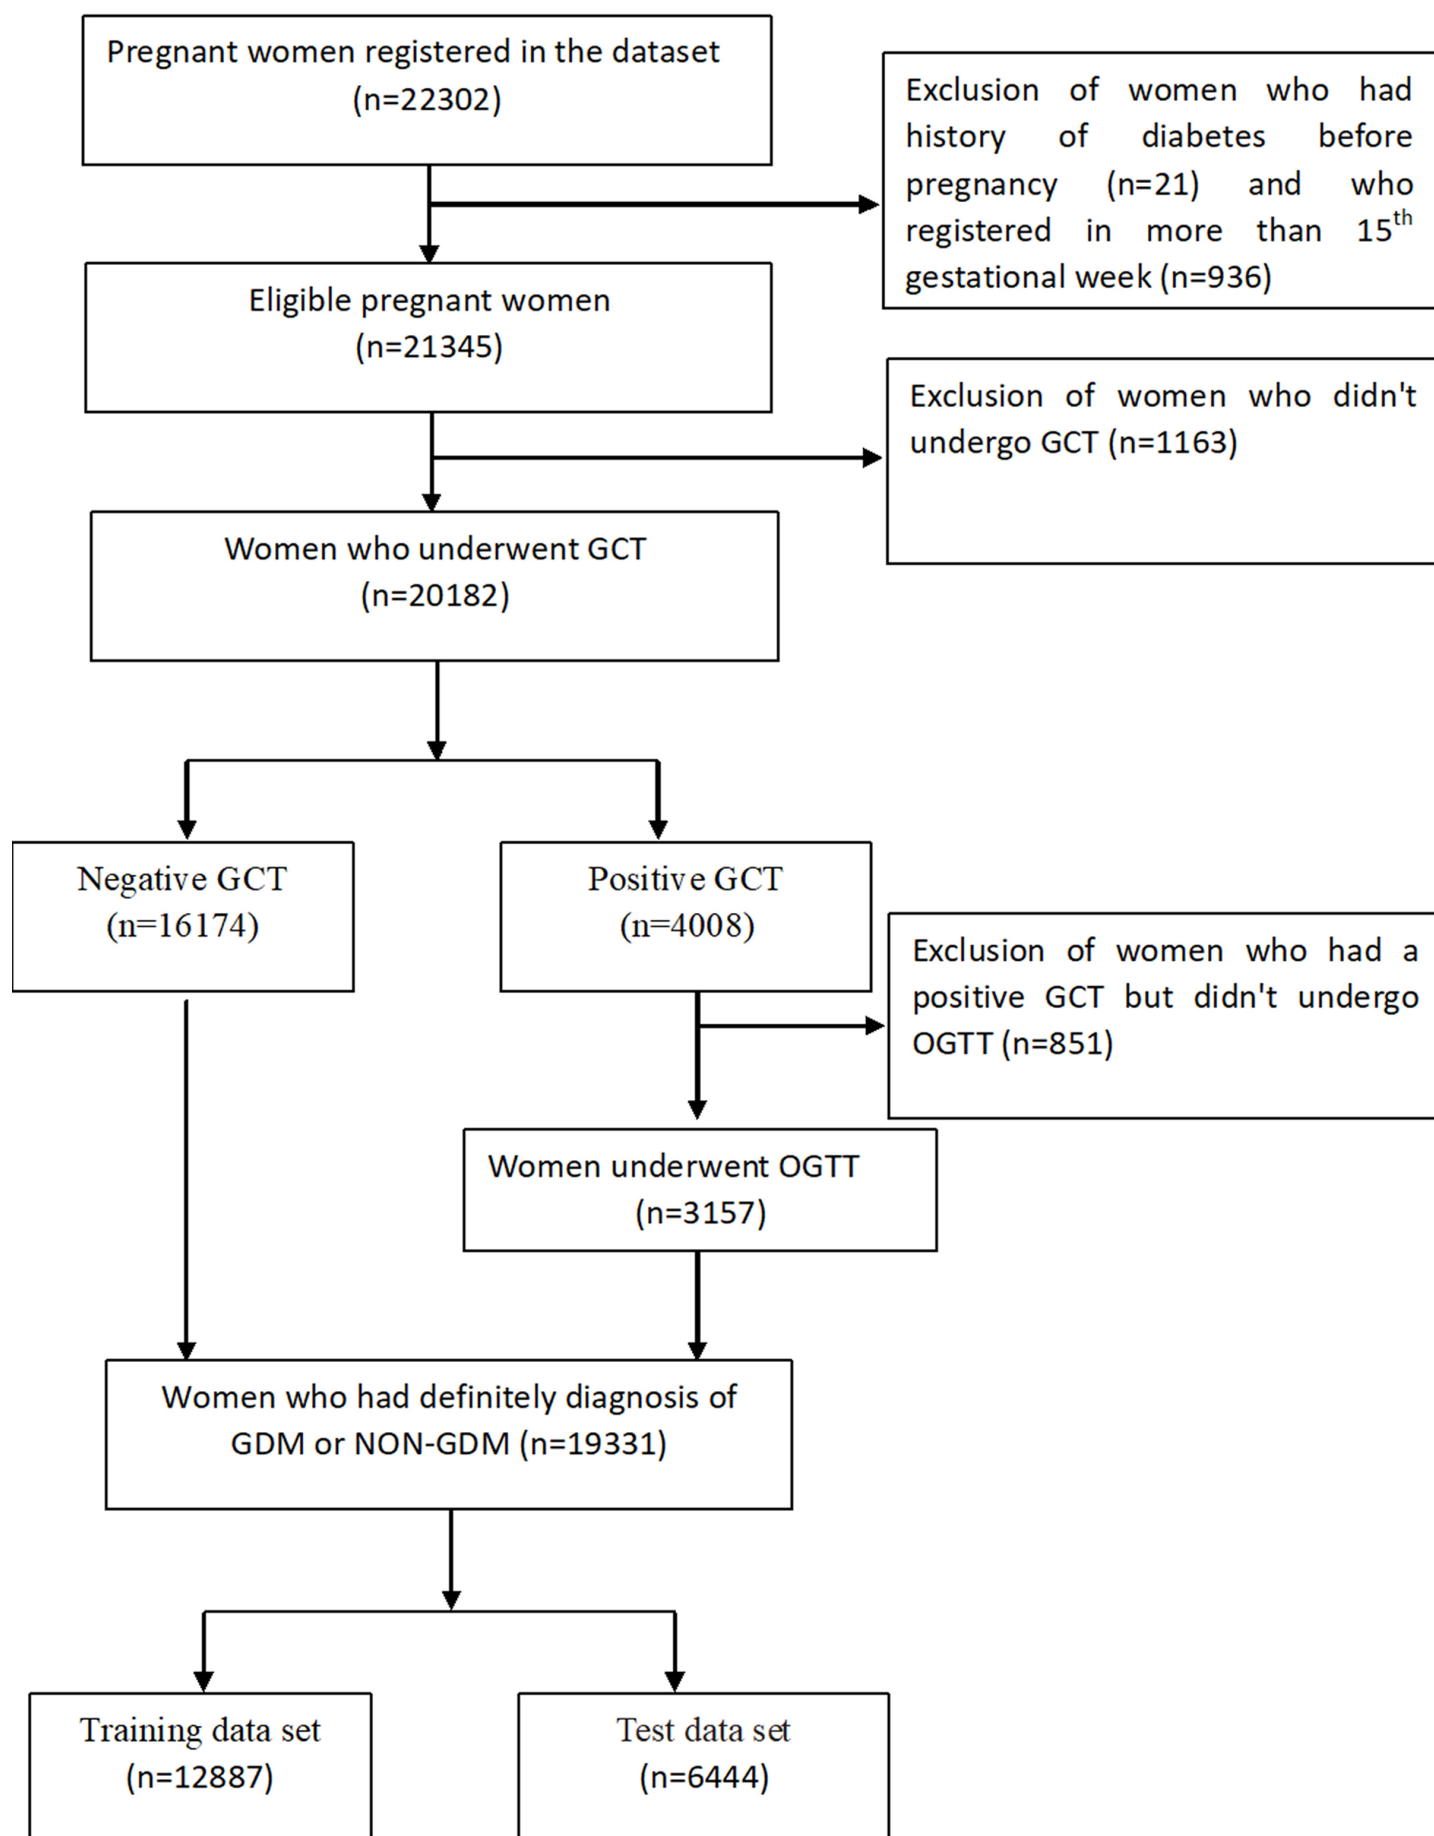

Supplementary figure. 1 the flow chart of inclusion and exclusion of participants (Abbreviation: GCT, 50-gram 1-hour glucose challenge test; GDM, gestational diabetes mellitus; OGTT, standard 75-gram 2-hour oral glucose tolerance test)
